# Supplementary material for: Phospholipase Cγ1 (PLCG1) overexpression is associated with tumor growth and poor survival in IDH wild-type lower-grade gliomas in adult patients
Source: PubMed Central journal article supplement (PMC8784314; doi:10.1038/s41374-021-00682-7), 2021-10-25
Supplement: 41374_2021_682_MOESM1_ESM.pdf [file 41374_2021_682_MOESM1_ESM.pdf]

## **Supplemental Materials**

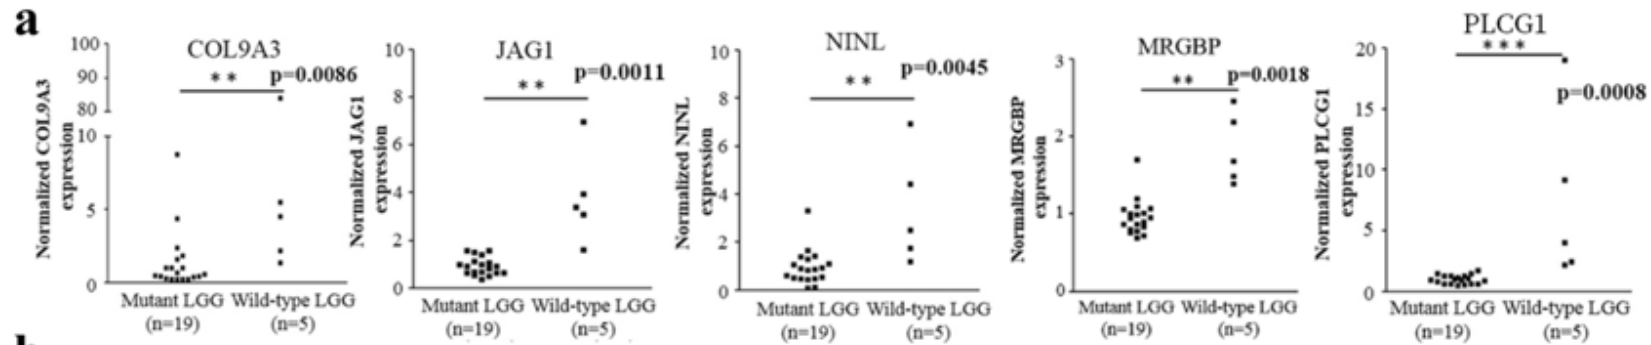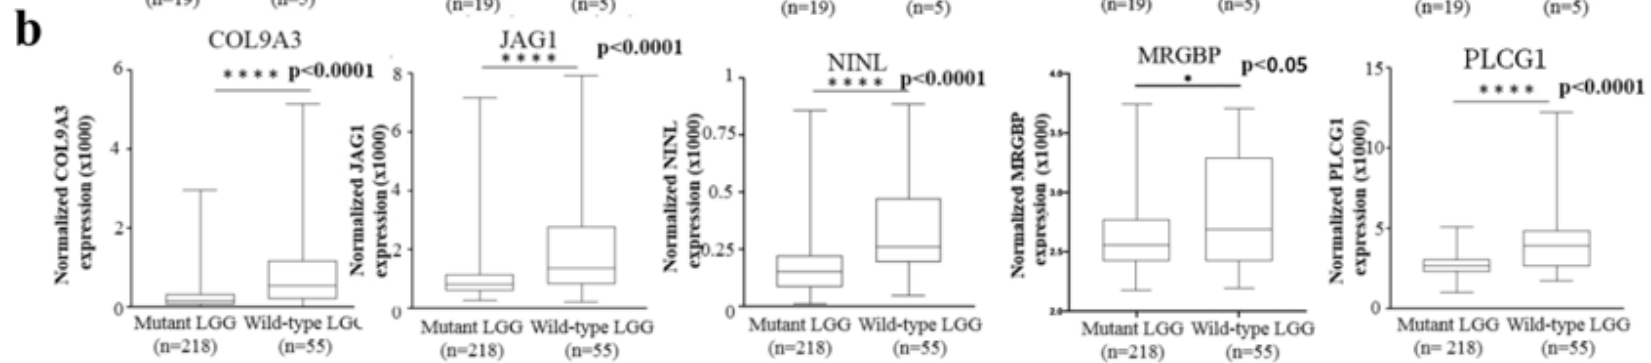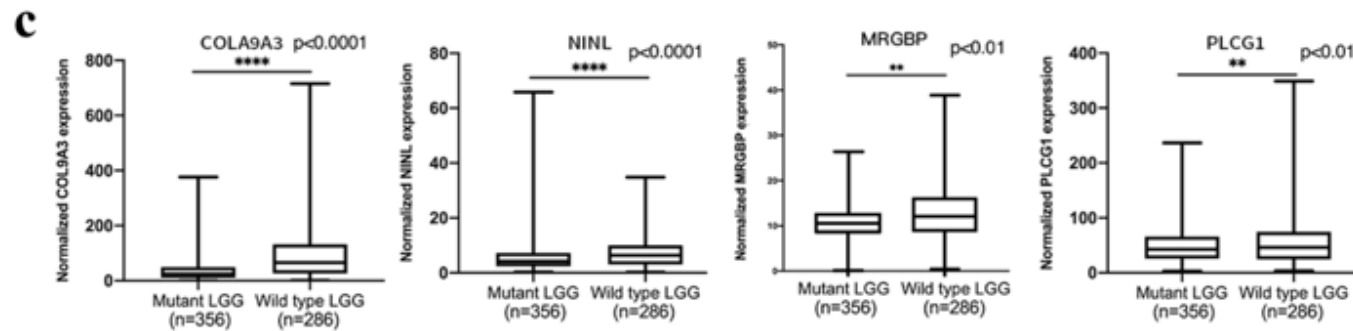

**Supplemental Figure 1 The COL9A3, JAG1, NINL, MRGBP and PLCG1 expression levels in three different cohorts.**

- a** The expression of these five genes on chromosome 20 in IDHwt group were significantly higher than that in IDHmut group in our RNA-seq cohort.
- b** The expression of these five genes on chromosome 20 in IDHwt group were significantly higher than that in IDHmut group in TCGA\_LGG cohort.
- c** The expression of these five genes on chromosome 20 in IDHwt group were significantly higher than that in IDHmut group in CGGA\_LGG cohort.

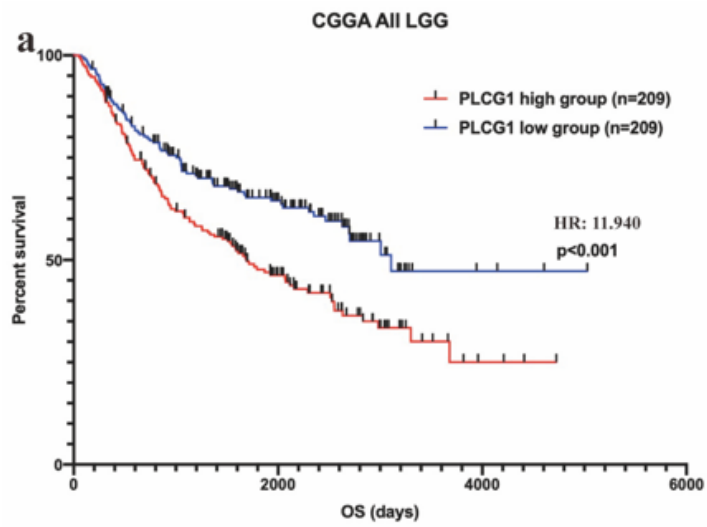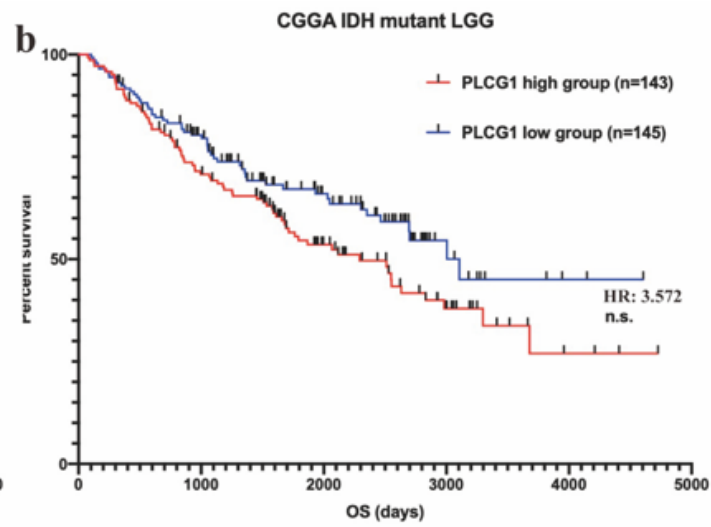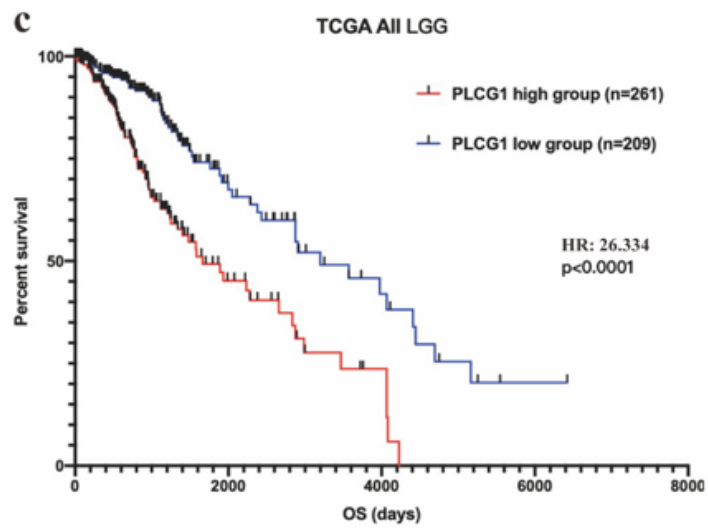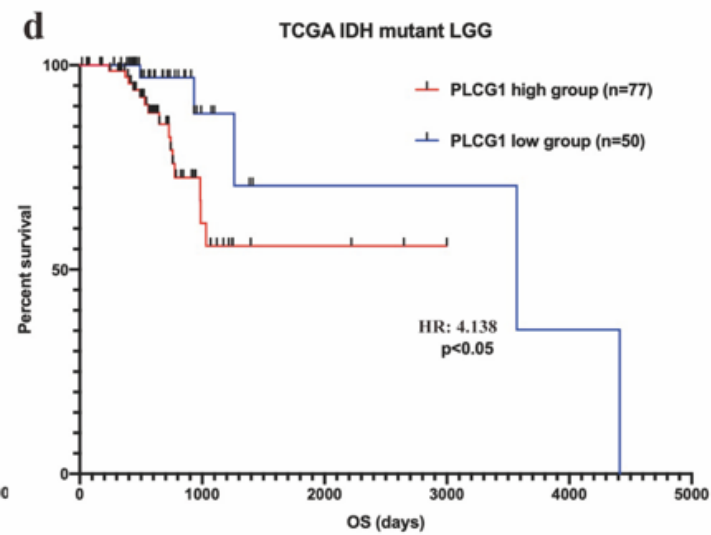

**Supplemental Figure 2 Kaplan-Meier survival analysis of PLCG1 in LGGs from public databases**

**a** Kaplan-Meier survival analysis of PLCG1 in all LGG patients from the CGGA\_LGG database.

**b** Kaplan-Meier survival analysis of PLCG1 in IM patients from the CGGA\_LGG database.

**c** Kaplan-Meier survival analysis of PLCG1 in all LGG patients from the TCGA\_LGG database.

**d** Kaplan-Meier survival analysis of PLCG1 in IM patients from the TCGA\_LGG database.

\*\*\* $p < 0.001$ , \*\* $p < 0.01$ , \* $p < 0.05$ . Data are expressed as the mean  $\pm$  SD.

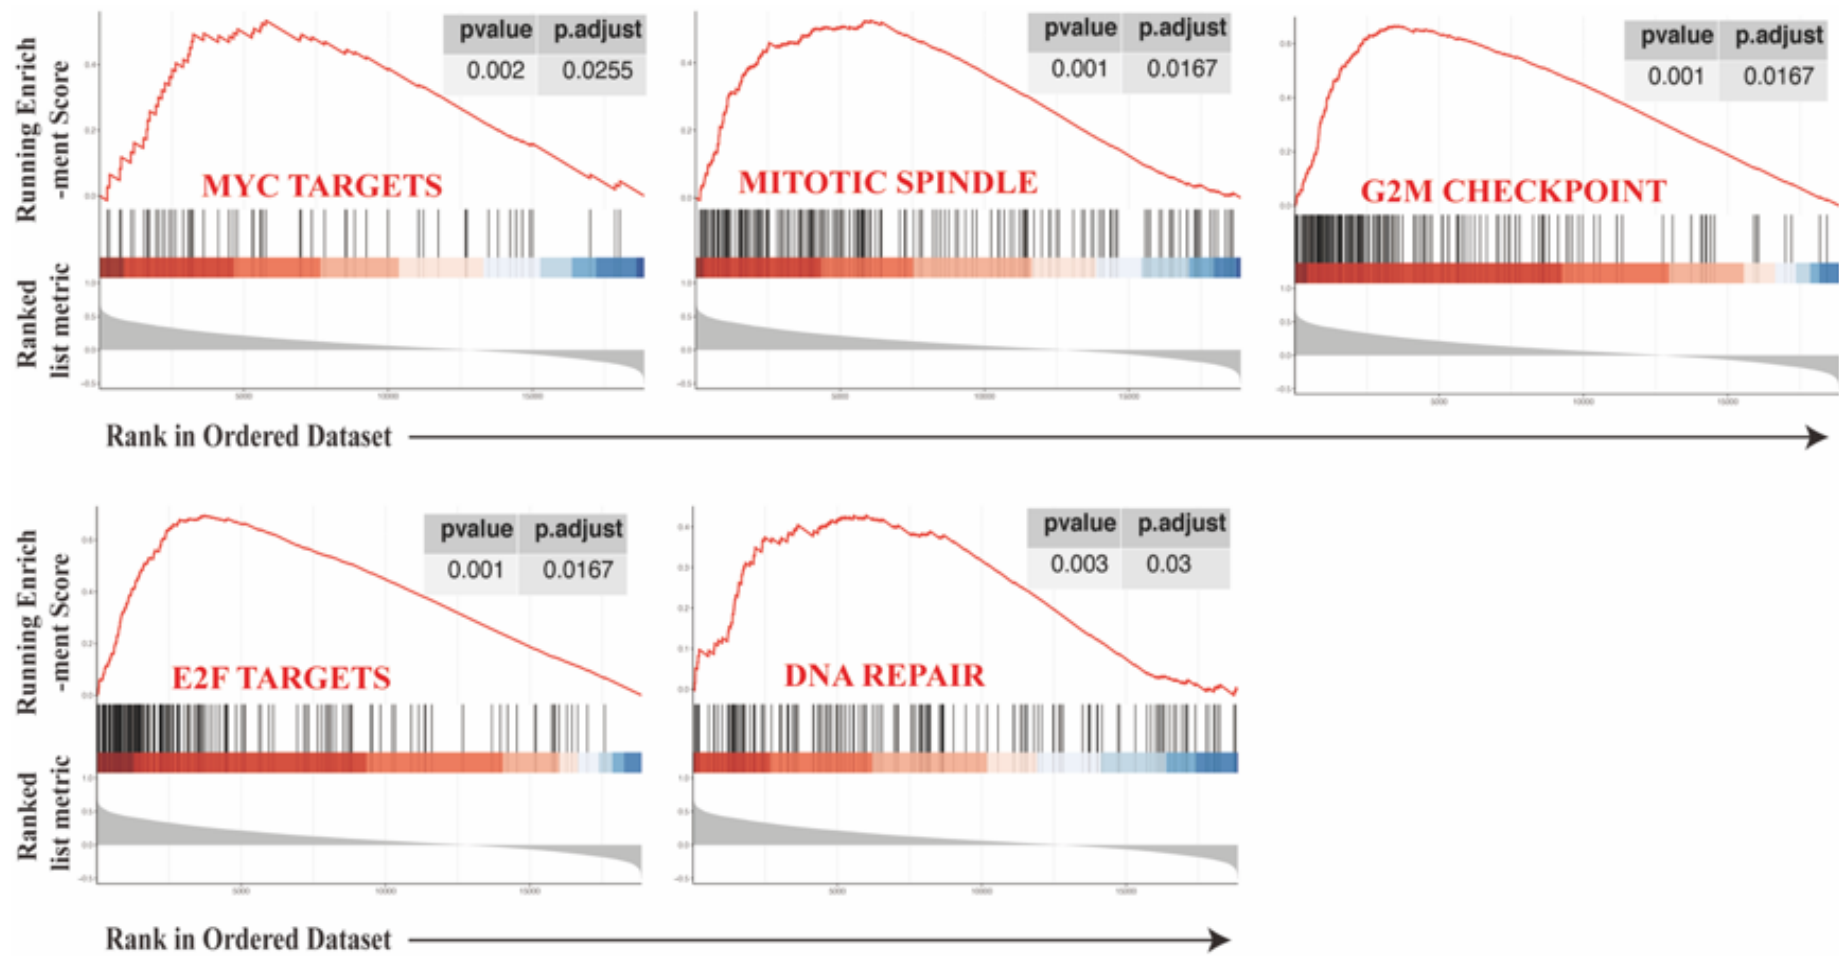

**Supplemental Figure 3 Enrichment plots of GSEA using the TCGA gene expression profiles of IDHwt LGG.**

Enrichment plots of GSEA using the CGGA gene expression profiles of IDHwt LGG indicated the top 5 functions in which PLCG1 is involved: MYC targets, the mitotic spindle, G2/M checkpoint, E2F targets and DNA repair.

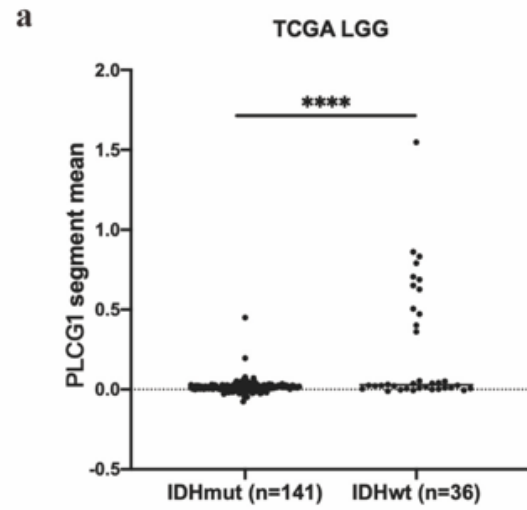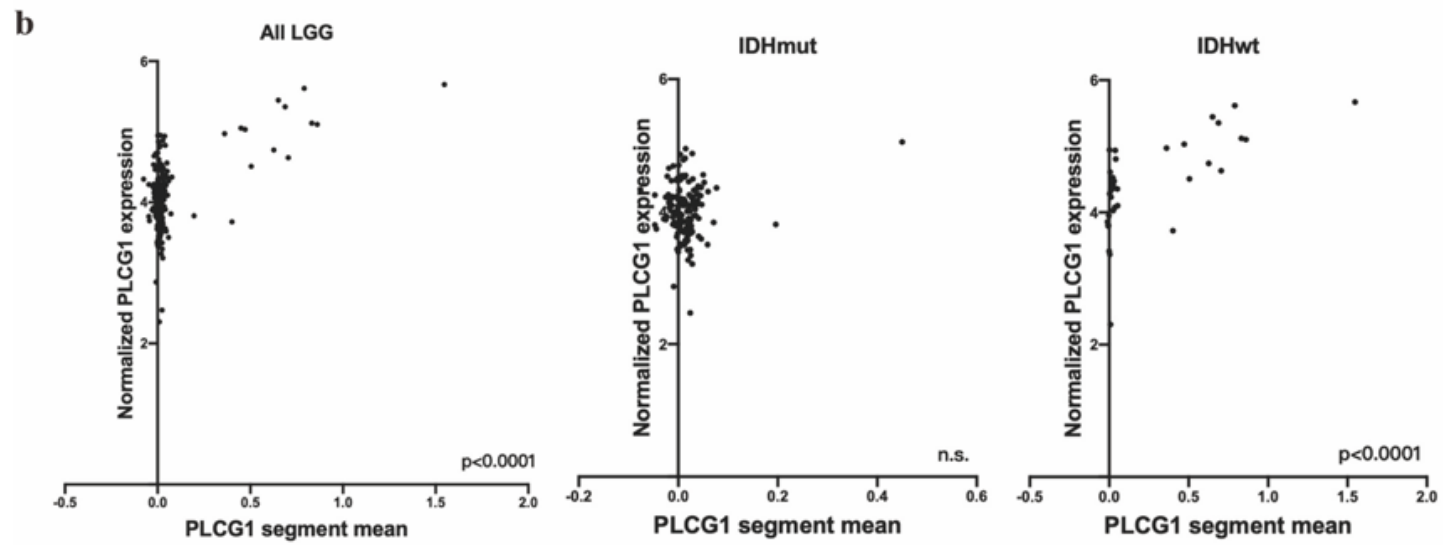

**Supplemental Figure 4 PLCG1 copy number gain/amplification difference between IDHwt and IDHmut LGGs**

**a** PLCG1 copy number gain/amplification was significantly higher in IDHwt group than IDHmut group.

**b** PLCG1 copy number gain/amplification was strongly correlated with PLCG1 mRNA level in IDHwt group but not in IDHmut group.

\*\*\*\* $p < 0.0001$ , \*\*\* $p < 0.001$ , \*\* $p < 0.01$ , \* $p < 0.05$ . Data are expressed as the mean  $\pm$  SD.



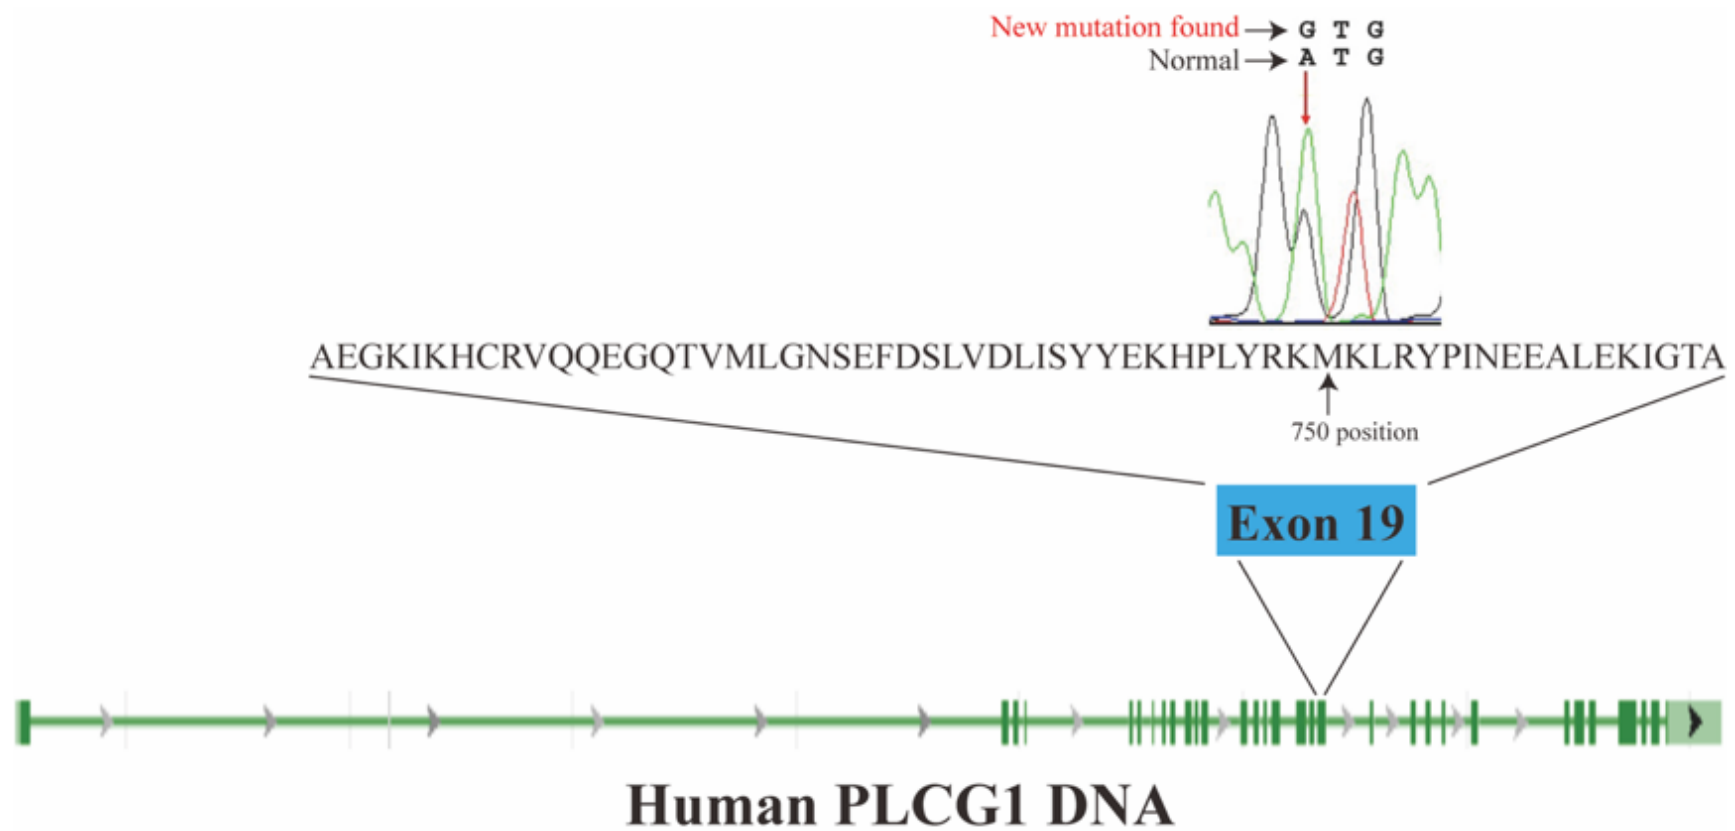

**Supplemental Figure 5 Identification of a novel PLCG1 mutation in IDH1/2 wild-type LGG.**

Next-Generation Sequencing confirmed that an IDHwt LGG harboured a missense mutation in exon 19 of PLCG1.



**Supplemental Table 1 Demographic and follow-up information of patients in Huashan hospital**

| Case number | gender | Age | Histology         | WHO grade | IDH 1/2 | PLCG1 mRNA level (relative to GAPDH) | Survival (death=1; alive=0) | OS (months) |
|-------------|--------|-----|-------------------|-----------|---------|--------------------------------------|-----------------------------|-------------|
| HS001708    | F      | 39  | Astrocytoma       | III       | wt      | -5.536787987                         | 1                           | 25          |
| HS001348    | M      | 66  | Oligodendroglioma | III       | wt      | -5.103207588                         | 1                           | 24          |
| HS001948    | F      | 46  | Astrocytoma       | II        | wt      | -3.564608574                         | 1                           | 12          |
| HS001280    | M      | 14  | Astrocytoma       | III       | wt      | -3.250869751                         | 0                           | NA          |
| HS000233    | F      | 39  | Astrocytoma       | II        | wt      | -2.262991905                         | 1                           | 66          |
| HS001381    | M      | 32  | Astrocytoma       | II        | wt      | -1.962715149                         | 1                           | 39          |
| HS001682    | F      | 82  | Astrocytoma       | III       | wt      | -1.786524773                         | 1                           | 18          |
| HS000189    | F      | 41  | Astrocytoma       | II        | wt      | -1.705540657                         | 1                           | 28          |
| HS001126    | M      | 48  | Astrocytoma       | II        | wt      | -1.651386261                         | 1                           | 33          |
| HS000274    | M      | 64  | Astrocytoma       | II        | wt      | -1.438883781                         | 1                           | 68          |
| HS002481    | M      | 58  | Astrocytoma       | II        | wt      | -1.391281128                         | 0                           | NA          |
| HS001520    | F      | 57  | Astrocytoma       | II        | wt      | -1.360155106                         | 1                           | 30          |
| HS000320    | M      | 39  | Astrocytoma       | II        | wt      | -1.200849533                         | 1                           | 23          |
| HS002592    | F      | 49  | Astrocytoma       | III       | wt      | -1.148181915                         | 1                           | 20          |
| HS000442    | M      | 71  | Astrocytoma       | II        | wt      | -1.124094009                         | 1                           | 38          |
| HS001874    | F      | 58  | Astrocytoma       | III       | wt      | -0.927822113                         | 0                           | NA          |
| HS002188    | F      | 66  | Astrocytoma       | III       | wt      | -0.919172287                         | 1                           | 21          |
| HS001679    | M      | 32  | Astrocytoma       | III       | wt      | -0.779790878                         | 1                           | 67          |
| HS000440    | M      | 36  | Astrocytoma       | II        | wt      | -0.748829842                         | 1                           | 31          |
| HS001042    | F      | 51  | Oligodendroglioma | II        | wt      | -0.667085648                         | 1                           | 33          |
| HS000437    | F      | 63  | Oligodendroglioma | II        | wt      | -0.440056801                         | 1                           | 34          |

|          |   |    |                                  |     |    |              |   |     |
|----------|---|----|----------------------------------|-----|----|--------------|---|-----|
| HS001903 | F | 19 | pleomorphic<br>xanthoastrocytoma | II  | wt | -0.35619545  | 0 | NA  |
| HS000610 | M | 43 | Astrocytoma                      | III | wt | -0.300171852 | 1 | 18  |
| HS001439 | M | 57 | Astrocytoma                      | III | wt | -0.250995636 | 1 | 37  |
| HS002079 | F | 52 | Astrocytoma                      | III | wt | -0.244243622 | 1 | NA  |
| HS000855 | F | 58 | Astrocytoma                      | III | wt | -0.233705521 | 1 | 26  |
| HS001524 | M | 46 | Astrocytoma                      | II  | wt | -0.215697289 | 1 | 12  |
| HS002075 | M | 54 | Oligodendroglioma                | II  | wt | -0.16984272  | 0 | NA  |
| HS001258 | F | 71 | Astrocytoma                      | III | wt | -0.168447495 | 1 | 29  |
| HS000617 | M | 49 | Astrocytoma                      | III | wt | -0.152105331 | 1 | 52  |
| HS000681 | M | 77 | Oligodendroglioma                | II  | wt | -0.139734268 | 1 | 35  |
| HS000195 | M | 58 | Oligodendroglioma                | II  | wt | -0.131448746 | 1 | 95  |
| HS001815 | F | 46 | Astrocytoma                      | III | wt | -0.123736382 | 1 | 18  |
| HS000693 | M | 67 | Astrocytoma                      | III | wt | -0.078547478 | 1 | 31  |
| HS001108 | M | 48 | Astrocytoma                      | III | wt | -0.040850639 | 1 | 43  |
| HS002609 | M | 15 | Astrocytoma                      | II  | wt | -0.03126812  | 1 | 28  |
| HS001269 | M | 44 | Astrocytoma                      | II  | wt | 0.021756172  | 1 | 61  |
| HS001541 | M | 29 | Astrocytoma                      | III | wt | 0.134871483  | 1 | 67  |
| HS000302 | M | 62 | Astrocytoma                      | III | wt | 0.192778587  | 1 | 103 |
| HS001071 | M | 67 | Astrocytoma                      | III | wt | 0.230211258  | 1 | 22  |
| HS000330 | M | 70 | Astrocytoma                      | III | wt | 0.409109116  | 1 | 33  |
| HS001237 | F | 69 | Astrocytoma                      | II  | wt | 0.488924026  | 1 | 25  |
| HS001460 | F | 33 | Astrocytoma                      | III | wt | 0.494145393  | 0 | NA  |
| HS001895 | M | 51 | Astrocytoma                      | III | wt | 0.502015114  | 1 | 17  |
| HS000926 | M | 25 | Astrocytoma                      | III | wt | 0.609566689  | 1 | 16  |

|          |   |    |                   |     |    |             |   |    |
|----------|---|----|-------------------|-----|----|-------------|---|----|
| HS002027 | M | 64 | Astrocytoma       | III | wt | 0.650065422 | 1 | 17 |
| HS001422 | F | 50 | Astrocytoma       | III | wt | 0.827513695 | 1 | 17 |
| HS000473 | M | 74 | Oligodendroglioma | III | wt | 0.874873161 | 1 | 14 |
| HS001414 | M | 49 | Astrocytoma       | III | wt | 0.895154953 | 1 | 26 |
| HS002336 | M | 29 | Astrocytoma       | II  | wt | 0.912822723 | 0 | NA |
| HS000913 | M | 66 | Astrocytoma       | III | wt | 0.937279701 | 1 | 12 |
| HS000725 | F | 43 | Astrocytoma       | III | wt | 1.091553688 | 1 | 21 |
| HS001940 | F | 61 | Oligodendroglioma | III | wt | 1.115790367 | 1 | 20 |
| HS002405 | M | 55 | Astrocytoma       | III | wt | 1.125824928 | 1 | 27 |
| HS001615 | M | 53 | Astrocytoma       | III | wt | 1.131703377 | 1 | 24 |
| HS002264 | F | 37 | Astrocytoma       | III | wt | 1.138157845 | 1 | 10 |
| HS001316 | F | 38 | Oligodendroglioma | III | wt | 1.14854908  | 1 | 30 |
| HS000772 | M | 58 | Astrocytoma       | III | wt | 1.189653397 | 1 | 12 |
| HS001344 | M | 68 | Astrocytoma       | III | wt | 1.233850479 | 1 | 2  |
| HS000738 | M | 73 | Oligodendroglioma | III | wt | 1.234389305 | 1 | 7  |
| HS000732 | M | 69 | Astrocytoma       | III | wt | 1.23916626  | 1 | 3  |
| HS002139 | F | 18 | Astrocytoma       | II  | wt | 1.460699081 | 1 | 28 |
| HS002523 | F | 37 | Oligodendroglioma | II  | wt | 1.519686699 | 1 | 22 |
| HS000673 | M | 53 | Astrocytoma       | III | wt | 1.556434631 | 1 | 22 |
| HS001493 | M | 39 | Astrocytoma       | II  | wt | 1.567727089 | 1 | 49 |
| HS001240 | M | 59 | Astrocytoma       | III | wt | 1.609639168 | 1 | 19 |
| HS000538 | F | 56 | Astrocytoma       | II  | wt | 1.680265427 | 1 | 37 |
| HS001352 | M | 69 | Astrocytoma       | II  | wt | 1.706268311 | 1 | 41 |
| HS000932 | M | 30 | Oligodendroglioma | II  | wt | 1.828027725 | 1 | 10 |
| HS002057 | F | 54 | Astrocytoma       | III | wt | 1.82954216  | 1 | 28 |

|          |   |    |                   |     |    |             |   |    |
|----------|---|----|-------------------|-----|----|-------------|---|----|
| HS001368 | M | 75 | Astrocytoma       | II  | wt | 1.840145111 | 1 | 14 |
| HS002053 | F | 64 | Astrocytoma       | III | wt | 1.869277    | 1 | 8  |
| HS002250 | M | 65 | Astrocytoma       | III | wt | 1.915079117 | 1 | 35 |
| HS002031 | M | 48 | Astrocytoma       | II  | wt | 1.978390694 | 1 | 17 |
| HS000828 | M | 53 | Astrocytoma       | III | wt | 1.991726875 | 1 | 16 |
| HS002010 | M | 77 | Astrocytoma       | III | wt | 2.097821236 | 1 | 12 |
| HS000670 | F | 72 | Astrocytoma       | III | wt | 2.098917007 | 1 | 27 |
| HS001054 | F | 54 | Astrocytoma       | II  | wt | 2.108097076 | 1 | 6  |
| HS001510 | M | 65 | Oligodendroglioma | III | wt | 2.137231827 | 1 | 83 |
| HS002426 | M | 65 | Astrocytoma       | II  | wt | 2.147414207 | 1 | 11 |
| HS001823 | M | 58 | Astrocytoma       | III | wt | 2.16795826  | 1 | 4  |
| HS000626 | M | 74 | Astrocytoma       | II  | wt | 2.233940125 | 1 | 38 |
| HS001457 | F | 59 | Astrocytoma       | III | wt | 2.238453865 | 1 | 13 |
| HS001406 | M | 22 | Astrocytoma       | II  | wt | 2.327997208 | 0 | NA |
| HS002065 | M | 38 | Astrocytoma       | III | wt | 2.340386391 | 1 | 6  |
| HS000598 | M | 32 | Astrocytoma       | II  | wt | 2.34677887  | 1 | 4  |
| HS002615 | F | 48 | Astrocytoma       | II  | wt | 2.379321098 | 1 | 17 |
| HS000599 | M | 59 | Oligodendroglioma | III | wt | 2.576972008 | 1 | 16 |
| HS001115 | F | 68 | Astrocytoma       | III | wt | 2.598757744 | 1 | 64 |
| HS002263 | M | 64 | Oligodendroglioma | III | wt | 2.693796158 | 1 | 12 |
| HS002349 | M | 37 | Oligodendroglioma | III | wt | 2.771742821 | 1 | 29 |
| HS001533 | F | 54 | Astrocytoma       | III | wt | 2.83595562  | 1 | 35 |
| HS002375 | M | 51 | Oligodendroglioma | II  | wt | 2.991323471 | 0 | NA |
| HS001719 | M | 54 | Astrocytoma       | II  | wt | 3.092228889 | 1 | 18 |
| HS001489 | F | 46 | Oligodendroglioma | III | wt | 3.132577896 | 1 | 69 |

|          |   |    |                   |     |    |             |   |    |
|----------|---|----|-------------------|-----|----|-------------|---|----|
| HS002095 | M | 57 | Astrocytoma       | II  | wt | 3.150182724 | 1 | 16 |
| HS002207 | F | 65 | Oligodendroglioma | III | wt | 3.193610191 | 1 | 38 |
| HS000770 | M | 83 | Astrocytoma       | III | wt | 3.346335411 | 1 | 6  |
| HS001313 | F | 58 | Astrocytoma       | II  | wt | 3.364608765 | 0 | NA |
| HS001023 | M | 65 | Astrocytoma       | III | wt | 3.401069641 | 1 | 23 |
| HS001516 | M | 51 | Astrocytoma       | III | wt | 3.455292702 | 1 | 7  |
| HS002379 | M | 63 | Oligodendroglioma | III | wt | 3.47376442  | 1 | 26 |
| HS000724 | M | 67 | Astrocytoma       | III | wt | 3.777253151 | 1 | 15 |
| HS001784 | M | 70 | Oligodendroglioma | III | wt | 3.874172211 | 1 | 10 |
| HS000502 | M | 67 | Oligodendroglioma | III | wt | 3.879079819 | 1 | 19 |
| HS001585 | M | 70 | Astrocytoma       | III | wt | 4.003928185 | 1 | 2  |
| HS002579 | M | 53 | Astrocytoma       | III | wt | 4.056534767 | 1 | 31 |
| HS001907 | M | 58 | Astrocytoma       | III | wt | 4.542236328 | 1 | 20 |
| HS000481 | M | 47 | Astrocytoma       | III | wt | 4.840776443 | 1 | 39 |
| HS000774 | M | 55 | Astrocytoma       | III | wt | 4.945576668 | 0 | 15 |
| HS000218 | M | 70 | Oligodendroglioma | III | wt | 5.03045845  | 1 | 11 |
| HS002255 | M | 49 | Astrocytoma       | III | wt | 5.137647629 | 1 | 11 |
| HS001386 | M | 22 | Astrocytoma       | III | wt | 5.209362984 | 1 | 13 |
| HS001709 | F | 67 | Astrocytoma       | III | wt | 5.490337372 | 1 | 15 |
| HS002617 | M | 55 | Astrocytoma       | III | wt | 5.764357567 | 1 | 11 |
| HS001848 | F | 48 | Astrocytoma       | III | wt | 6.090341568 | 1 | 20 |
| HS001924 | M | 36 | Astrocytoma       | III | wt | 6.126196861 | 1 | 18 |
| HS001925 | M | 49 | Astrocytoma       | III | wt | 6.206400871 | 1 | 49 |
| HS001405 | M | 62 | Astrocytoma       | II  | wt | 6.581041336 | 1 | 10 |
| HS002096 | F | 35 | Astrocytoma       | II  | wt | 6.593013763 | 1 | 10 |

|          |   |    |                   |     |    |             |   |    |
|----------|---|----|-------------------|-----|----|-------------|---|----|
| HS001934 | M | 44 | Oligodendroglioma | III | wt | 6.674445152 | 1 | 50 |
| HS001274 | M | 71 | Astrocytoma       | II  | wt | 7.081605911 | 1 | 16 |
| HS001326 | M | 63 | Astrocytoma       | II  | wt | 7.169106483 | 1 | 7  |
| HS001796 | M | 65 | Astrocytoma       | III | wt | 7.696310997 | 1 | 28 |
| HS001288 | F | 59 | Astrocytoma       | III | wt | 8.614797592 | 1 | 13 |



**Supplemental Table 2 QPCR, IHC and FISH results of PLCG1 in representative patients in Huashan hospital**

| Case number | gender | Age | Histology         | WHO grade | IDH 1/2 | PLCG1 IHC score | PLCG1 positive? | PLCG1 amplification (Yes/no) | PLCG1 expression (relative to TBP) |
|-------------|--------|-----|-------------------|-----------|---------|-----------------|-----------------|------------------------------|------------------------------------|
| G2390       | M      | 33  | oligodendroglioma | II        | mutant  | 0               | No              | No                           | 0.420879261                        |
| G2125       | M      | 14  | astrocytoma       | III       | wt      | 4               | Yes             | No                           | 1.116512962                        |
| G2199       | M      | 58  | astrocytoma       | III       | mutant  | 0               | No              | No                           | 1.136161816                        |
| G2304       | M      | 75  | oligoastrocytomas | III       | mutant  | 2               | No              | No                           | 1.193931415                        |
| G1974       | F      | 35  | oligodendroglioma | III       | mutant  | 2               | No              | No                           | 1.328378858                        |
| G1797       | M      | 58  | astrocytoma grade | II        | mutant  | 0               | No              | No                           | 1.345367209                        |
| G2020       | M      | 32  | astrocytoma       | II        | mutant  | 2               | No              | No                           | 1.891241153                        |
| G2075       | F      | 54  | oligodendroglioma | II        | wt      | 2               | No              | No                           | 1.926818602                        |
| G2389       | M      | 62  | astrocytoma       | II        | mutant  | 0               | No              | No                           | 1.995845438                        |
| G1967       | F      | 49  | astrocytoma       | II        | mutant  | 3               | No              | No                           | 2.086377187                        |
| G2197       | M      | 37  | astrocytoma       | II        | mutant  | 0               | No              | No                           | 2.249077435                        |
| G2220       | F      | 63  | astrocytoma       | III       | mutant  | 0               | No              | Yes                          | 2.866585546                        |
| G2207       | M      | 42  | astrocytoma       | III       | wt      | 4               | Yes             | Yes                          | 2.892552515                        |
| G2064       | M      | 53  | astrocytoma       | II        | mutant  | 0               | No              | Yes                          | 3.113725232                        |
| G2201       | M      | 47  | astrocytoma       | II        | wt      | 4               | Yes             | No                           | 3.168207148                        |
| G2320       | M      | 26  | astrocytoma       | III       | wt      | 9               | Yes             | Yes                          | 3.658255909                        |
| G2212       | M      | 27  | astrocytoma       | III       | wt      | 2               | No              | No                           | 4.060526114                        |
| G1803       | F      | 58  | astrocytoma       | III       | wt      | 3               | No              | No                           | 4.416099367                        |
| G1697       | M      | 68  | astrocytoma       | III       | wt      | 6               | Yes             | Yes                          | 4.809876996                        |
| G2149       | F      | 38  | oligodendroglioma | II        | wt      | 6               | Yes             | Yes                          | 19.23950798                        |
| G2163       | M      | 51  | oligodendroglioma | II        | wt      | 4               | Yes             | Yes                          | 26.90246878                        |

---

|       |   |    |             |    |    |   |     |     |             |
|-------|---|----|-------------|----|----|---|-----|-----|-------------|
| G2182 | M | 36 | astrocytoma | II | wt | 6 | Yes | Yes | 27.43603317 |
|-------|---|----|-------------|----|----|---|-----|-----|-------------|

---

**Supplemental Table 3 PLCG1 siRNA sequence**

|                 | Sense (5'-3')         | Antisense (5'-3')      |
|-----------------|-----------------------|------------------------|
| PLCG1-Homo-336  | CCAUUGACAUUCGUGAAAUTT | AUUUCACGAAUGUCA AUGGTT |
| PLCG1-Homo-1303 | GCACACCAUCAAGGAGCAUTT | AUGCUCUUGAUGGUGUGCTT   |
| PLCG1-Homo-1384 | GCAGAGAAACAUGGCCCAATT | UUGGGCCAUGUUUCUCUGCTT  |
